# Supplementary material for: Phenology and ecological role of aerobic anoxygenic phototrophs in freshwaters
Source: PubMed Central journal article supplement (PMC10976687; doi:10.1186/s40168-024-01786-0), 2024-03-27
Supplement: 40168_2024_1786_MOESM2_ESM.pdf [file 40168_2024_1786_MOESM2_ESM.pdf]

A

## Alphaproteobacteria community 0.5 m

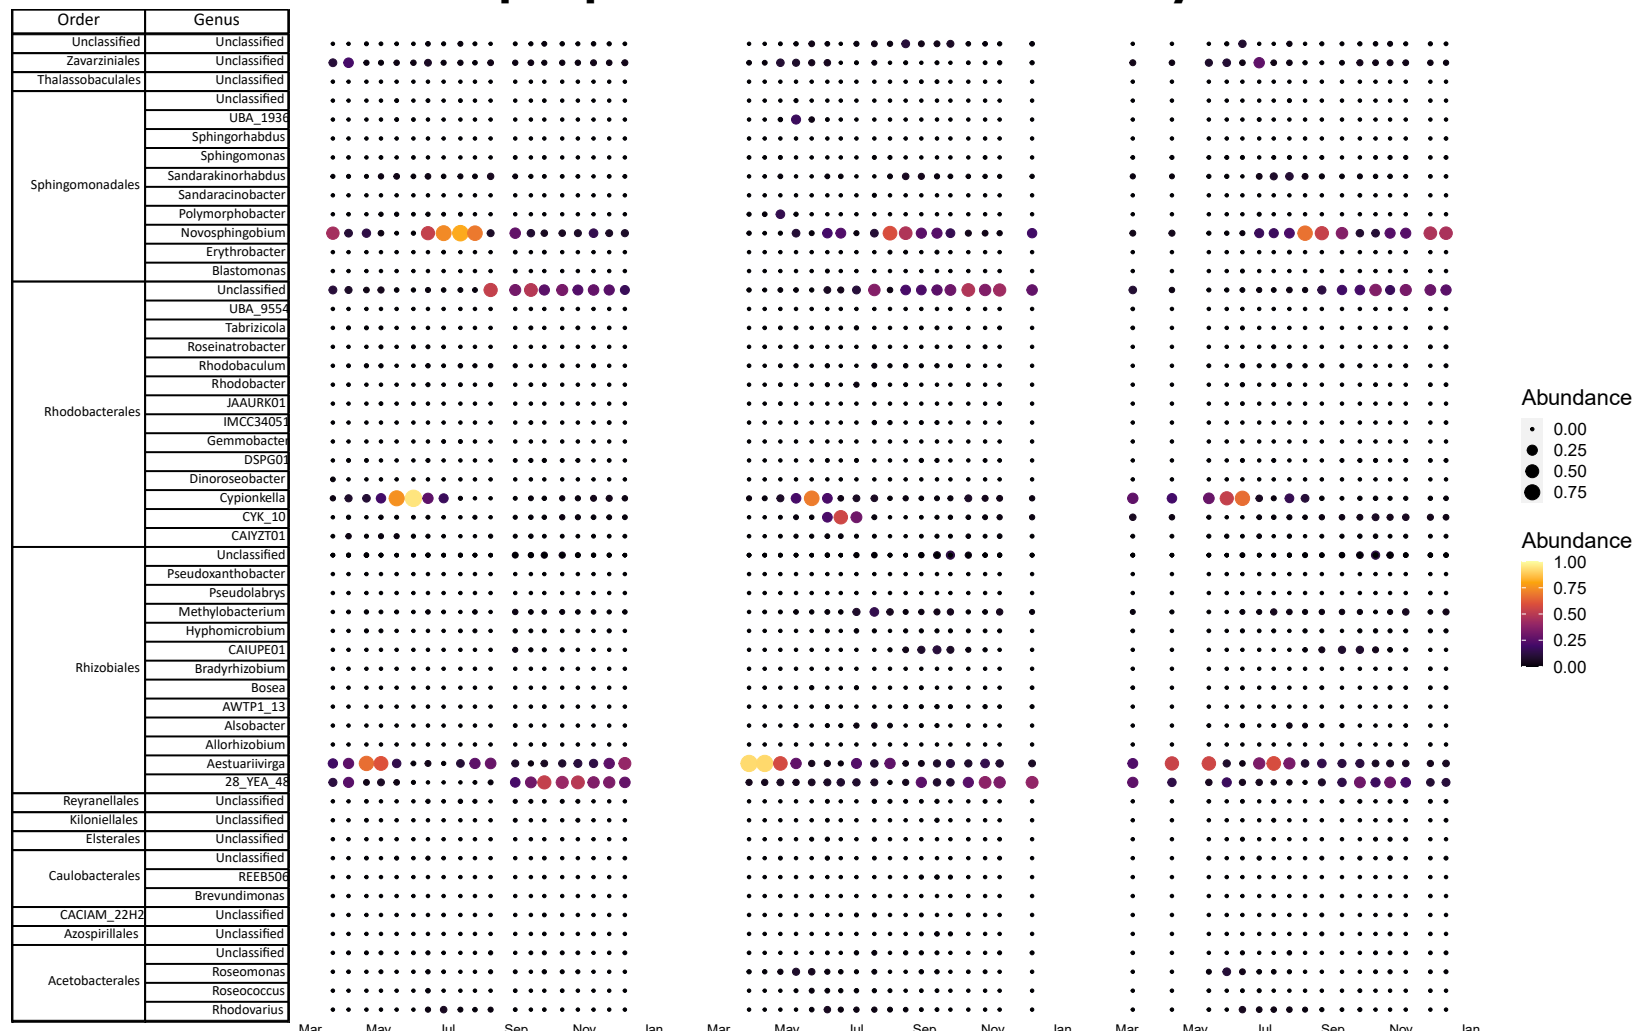

B

## Alphaproteobacteria community 2 m

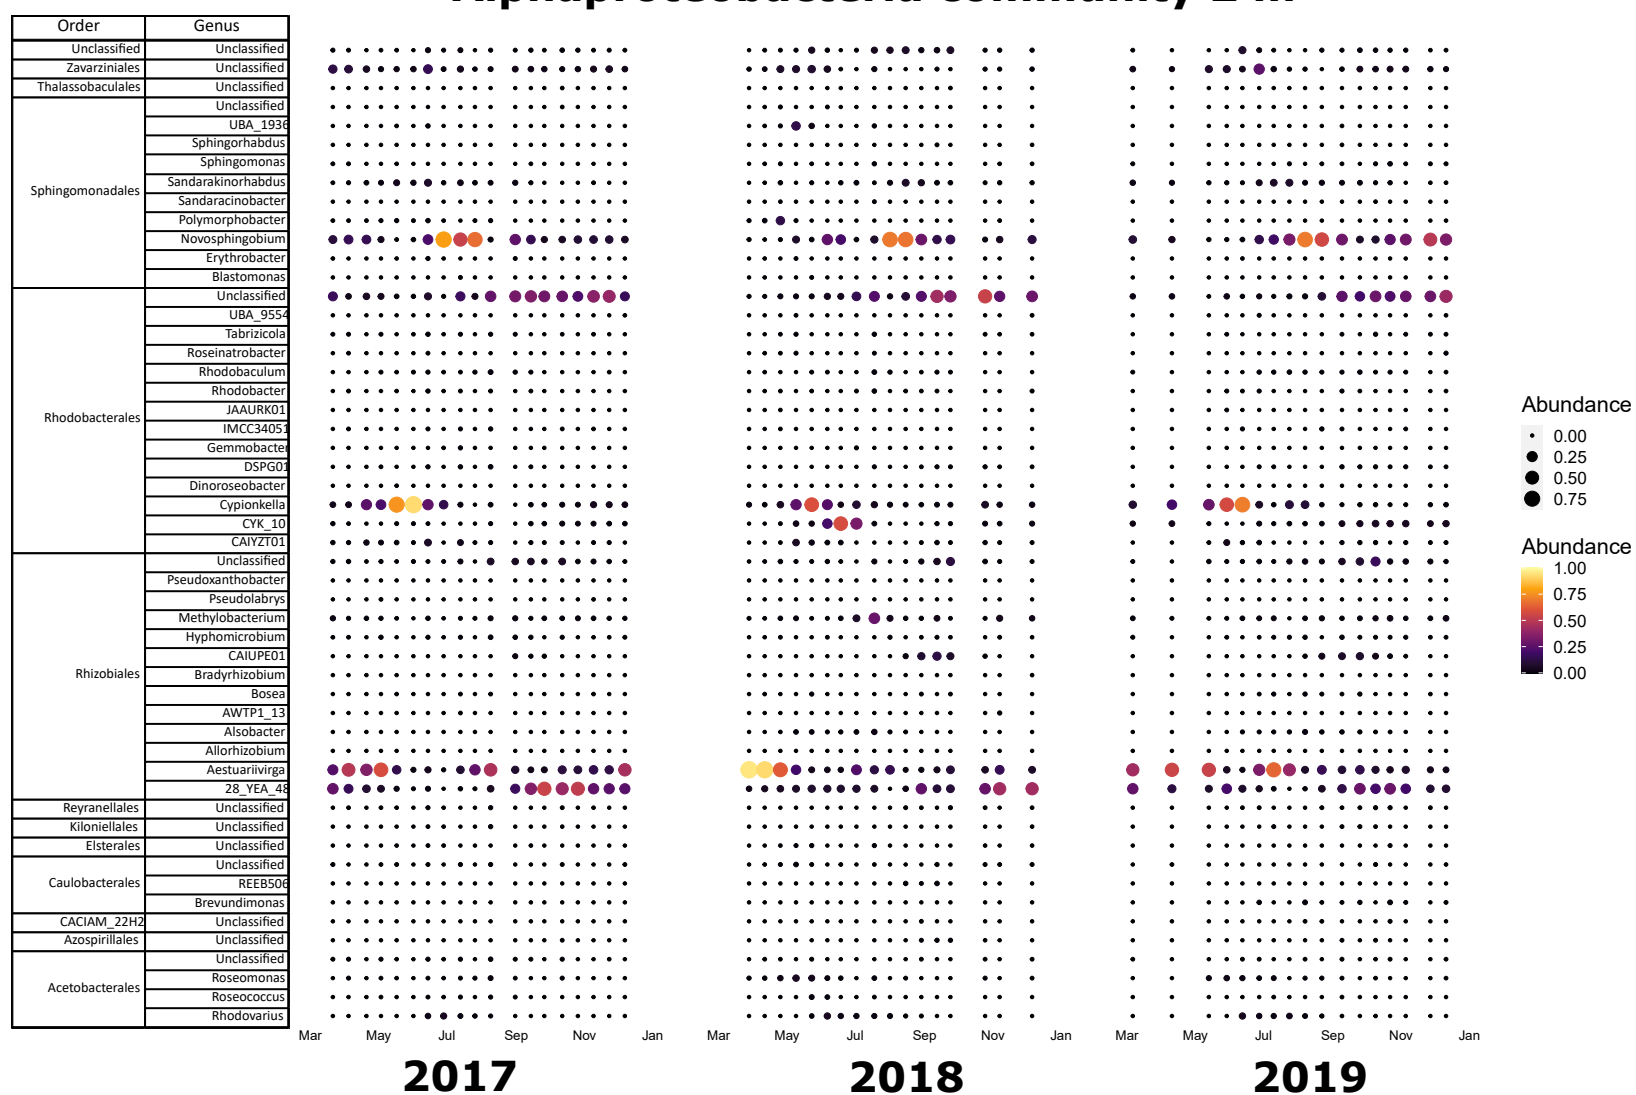

C

## Alphaproteobacteria community 5 m

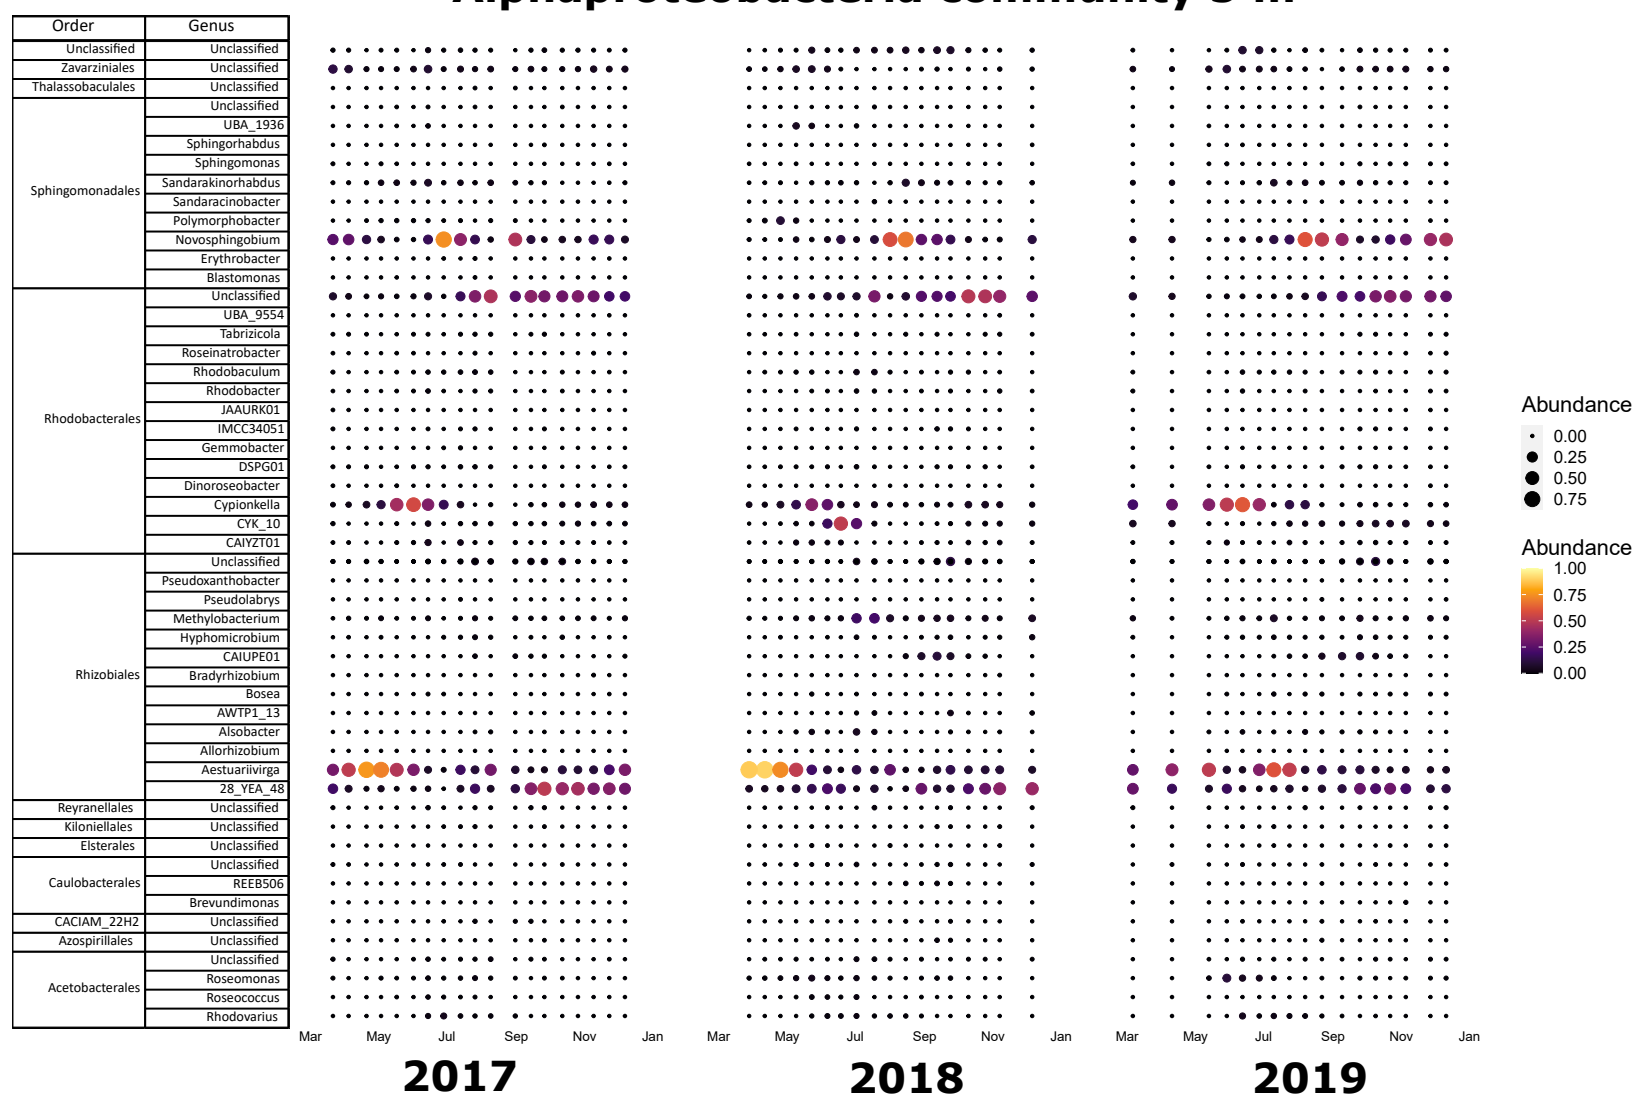

D

## Alphaproteobacteria community 8 m

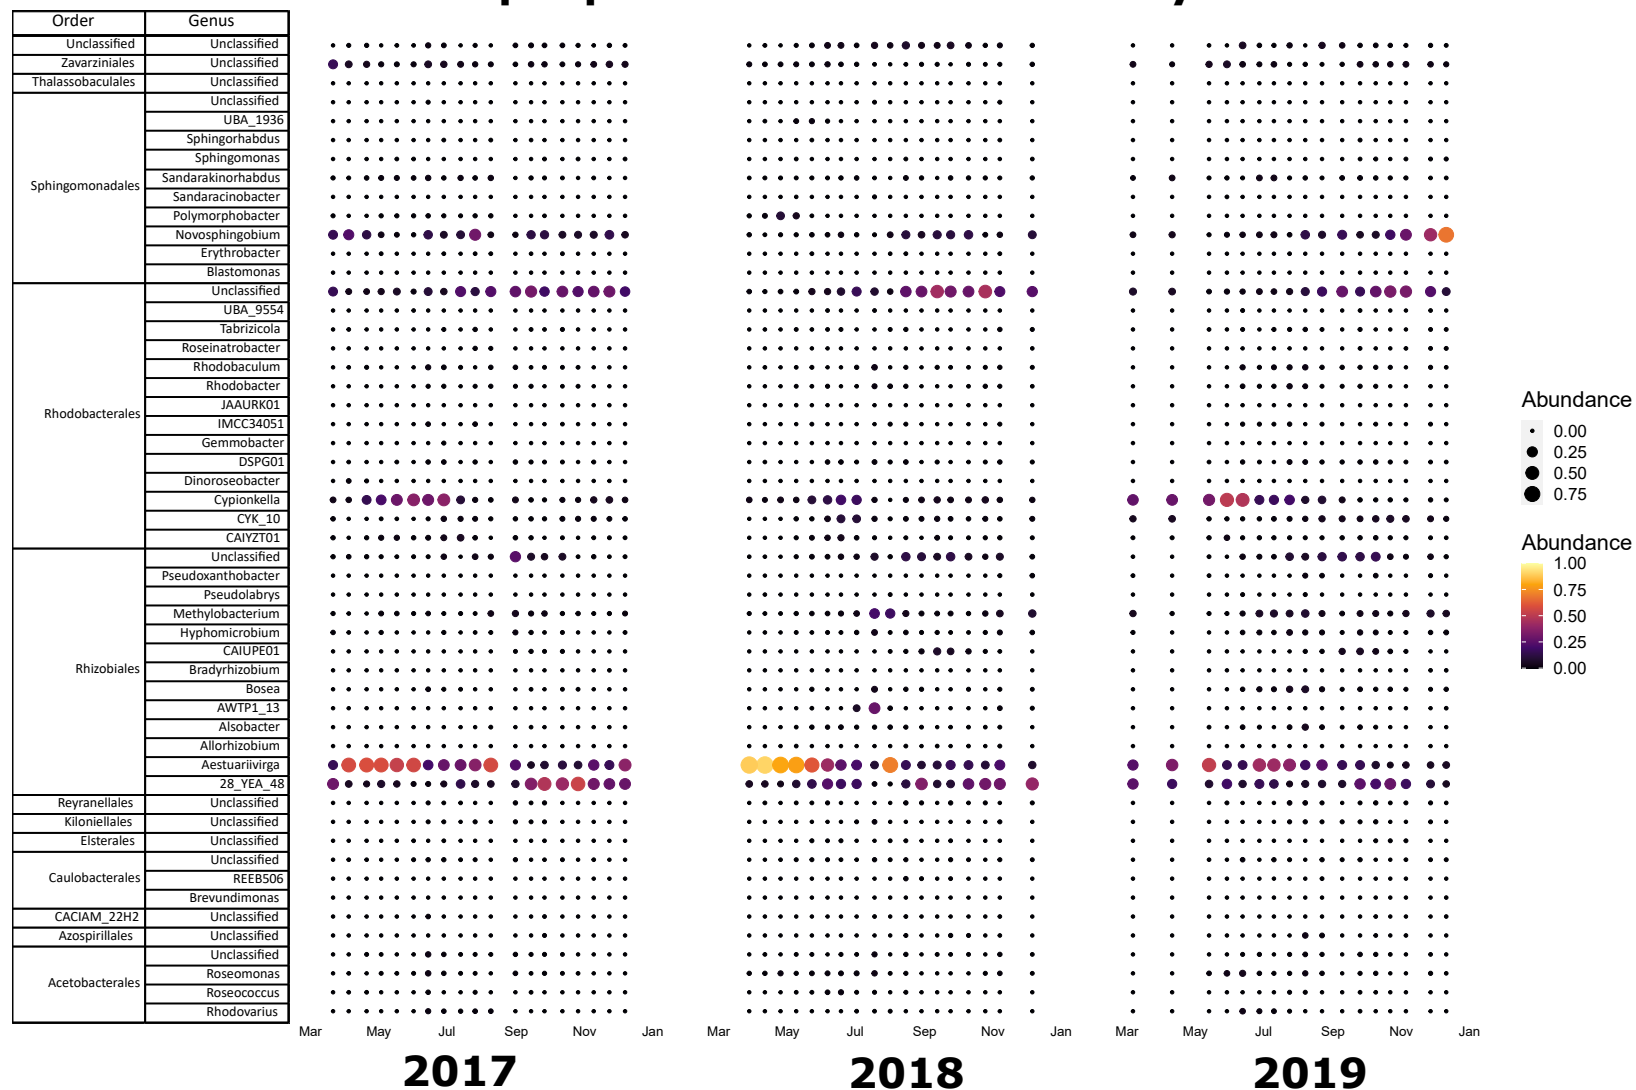

Supplementary Figure S2: Alphaproteobacteria community composition at order and genus level for 3-year sampling at 0,5 (A), 2 (B), 5 (C) and 8 m depth (D). Larger size and brighter colours are directly proportional to the relative contribution of each genus to the total Alphaproteobacteria community.
