# Supplementary material for: Phenology and ecological role of aerobic anoxygenic phototrophs in freshwaters
Source: PubMed Central journal article supplement (PMC10976687; doi:10.1186/s40168-024-01786-0), 2024-03-27
Supplement: 40168_2024_1786_MOESM6_ESM.pdf [file 40168_2024_1786_MOESM6_ESM.pdf]

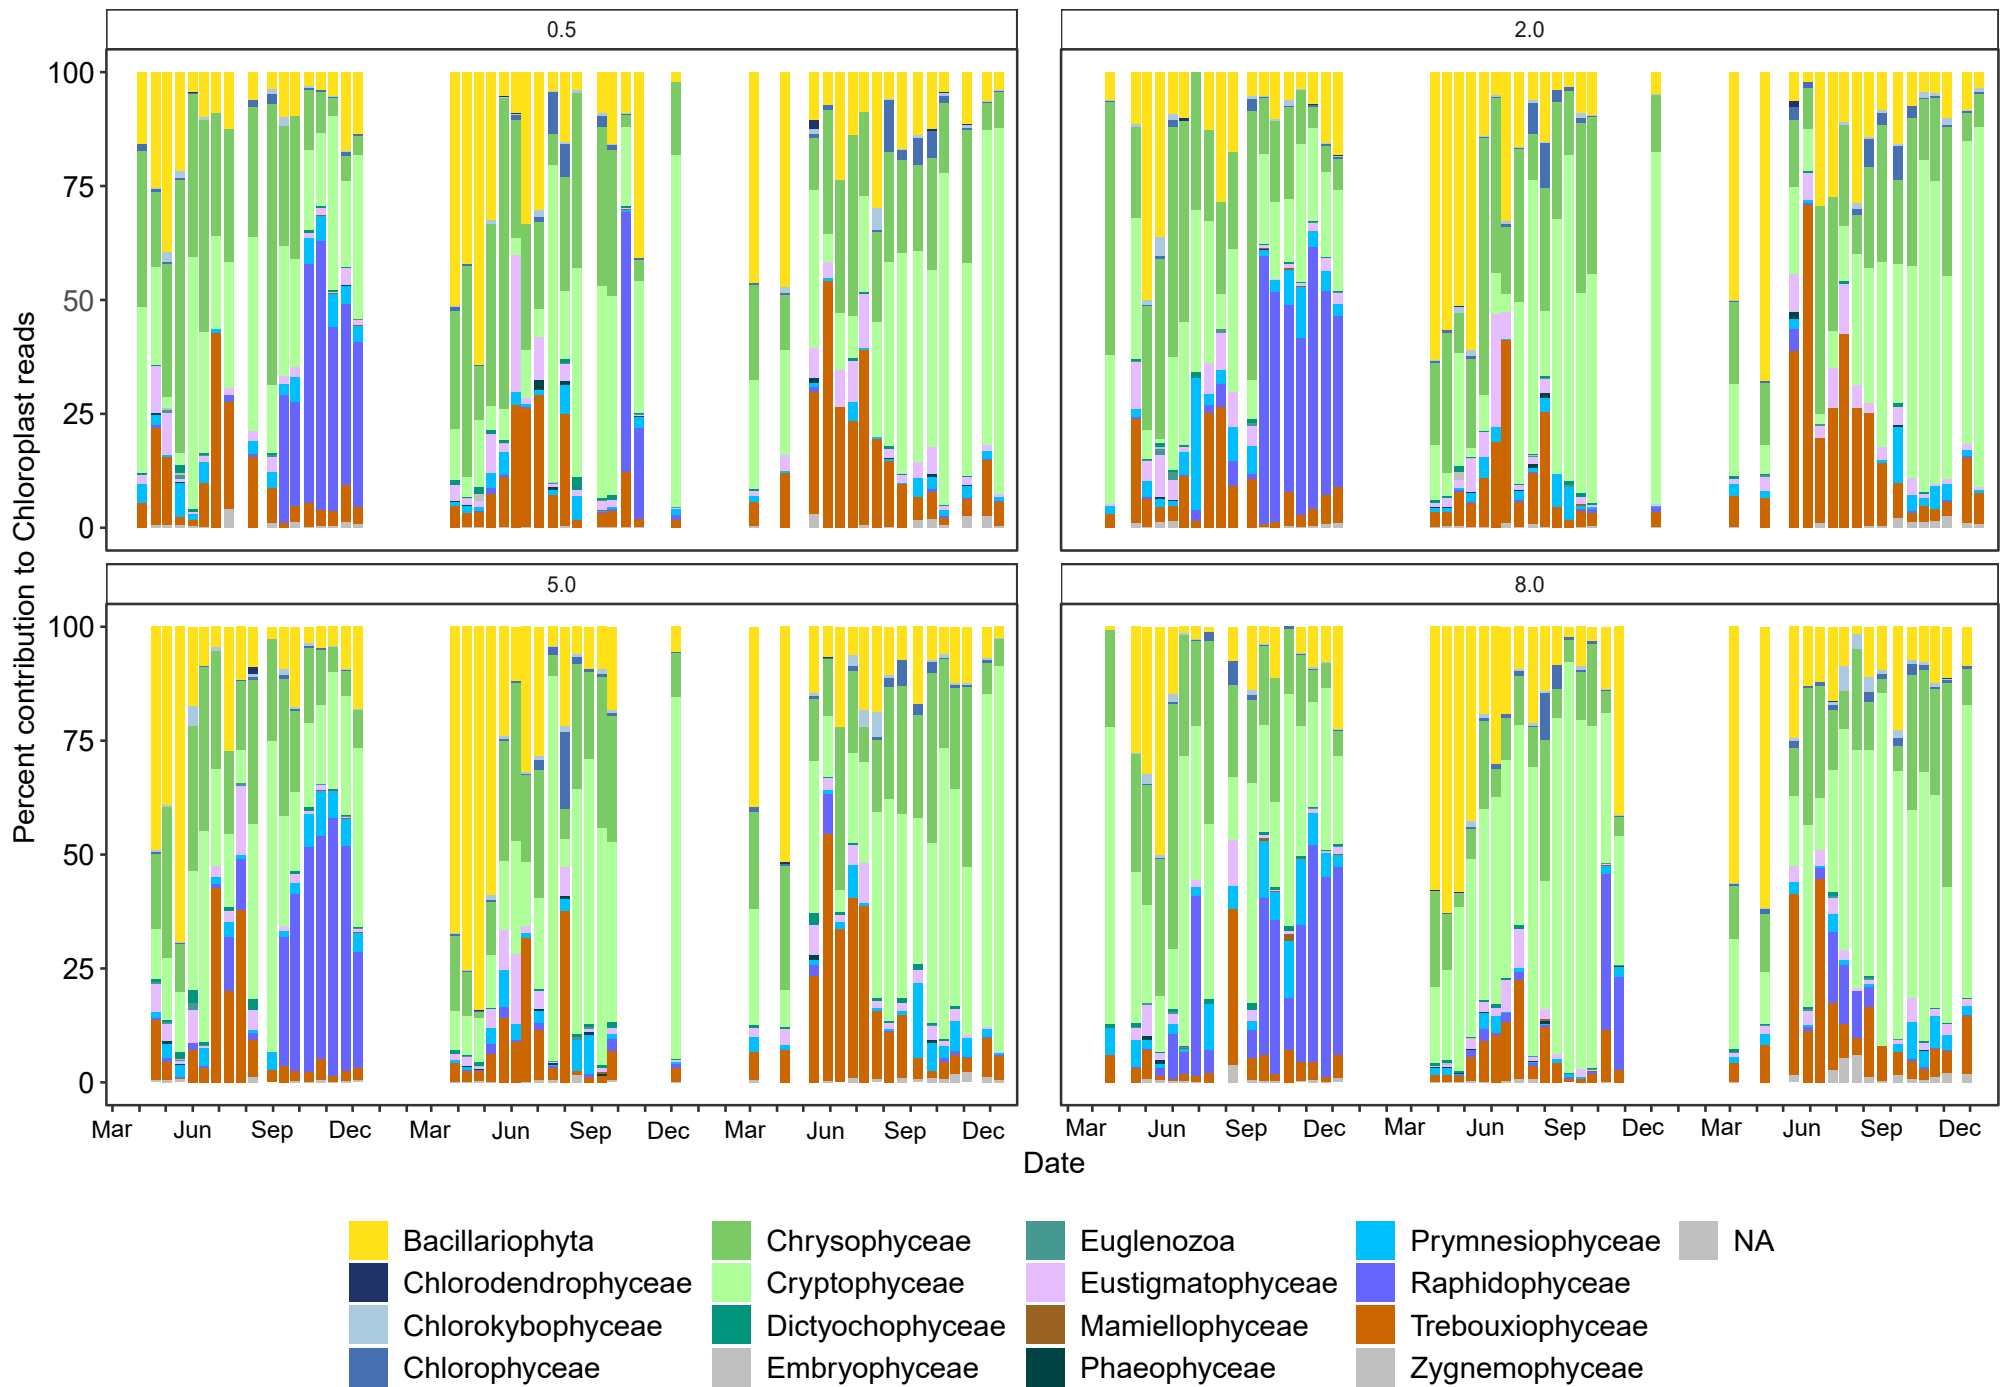

**Supplementary Figure S6:** Phytoplankton chloroplast-based community composition at class level for 0.5, 2, 5 and 8 meters' depth during 3-years temporal series.
