# Supplementary material for: Phenology and ecological role of aerobic anoxygenic phototrophs in freshwaters
Source: PubMed Central journal article supplement (PMC10976687; doi:10.1186/s40168-024-01786-0), 2024-03-27
Supplement: 40168_2024_1786_MOESM7_ESM.pdf [file 40168_2024_1786_MOESM7_ESM.pdf]

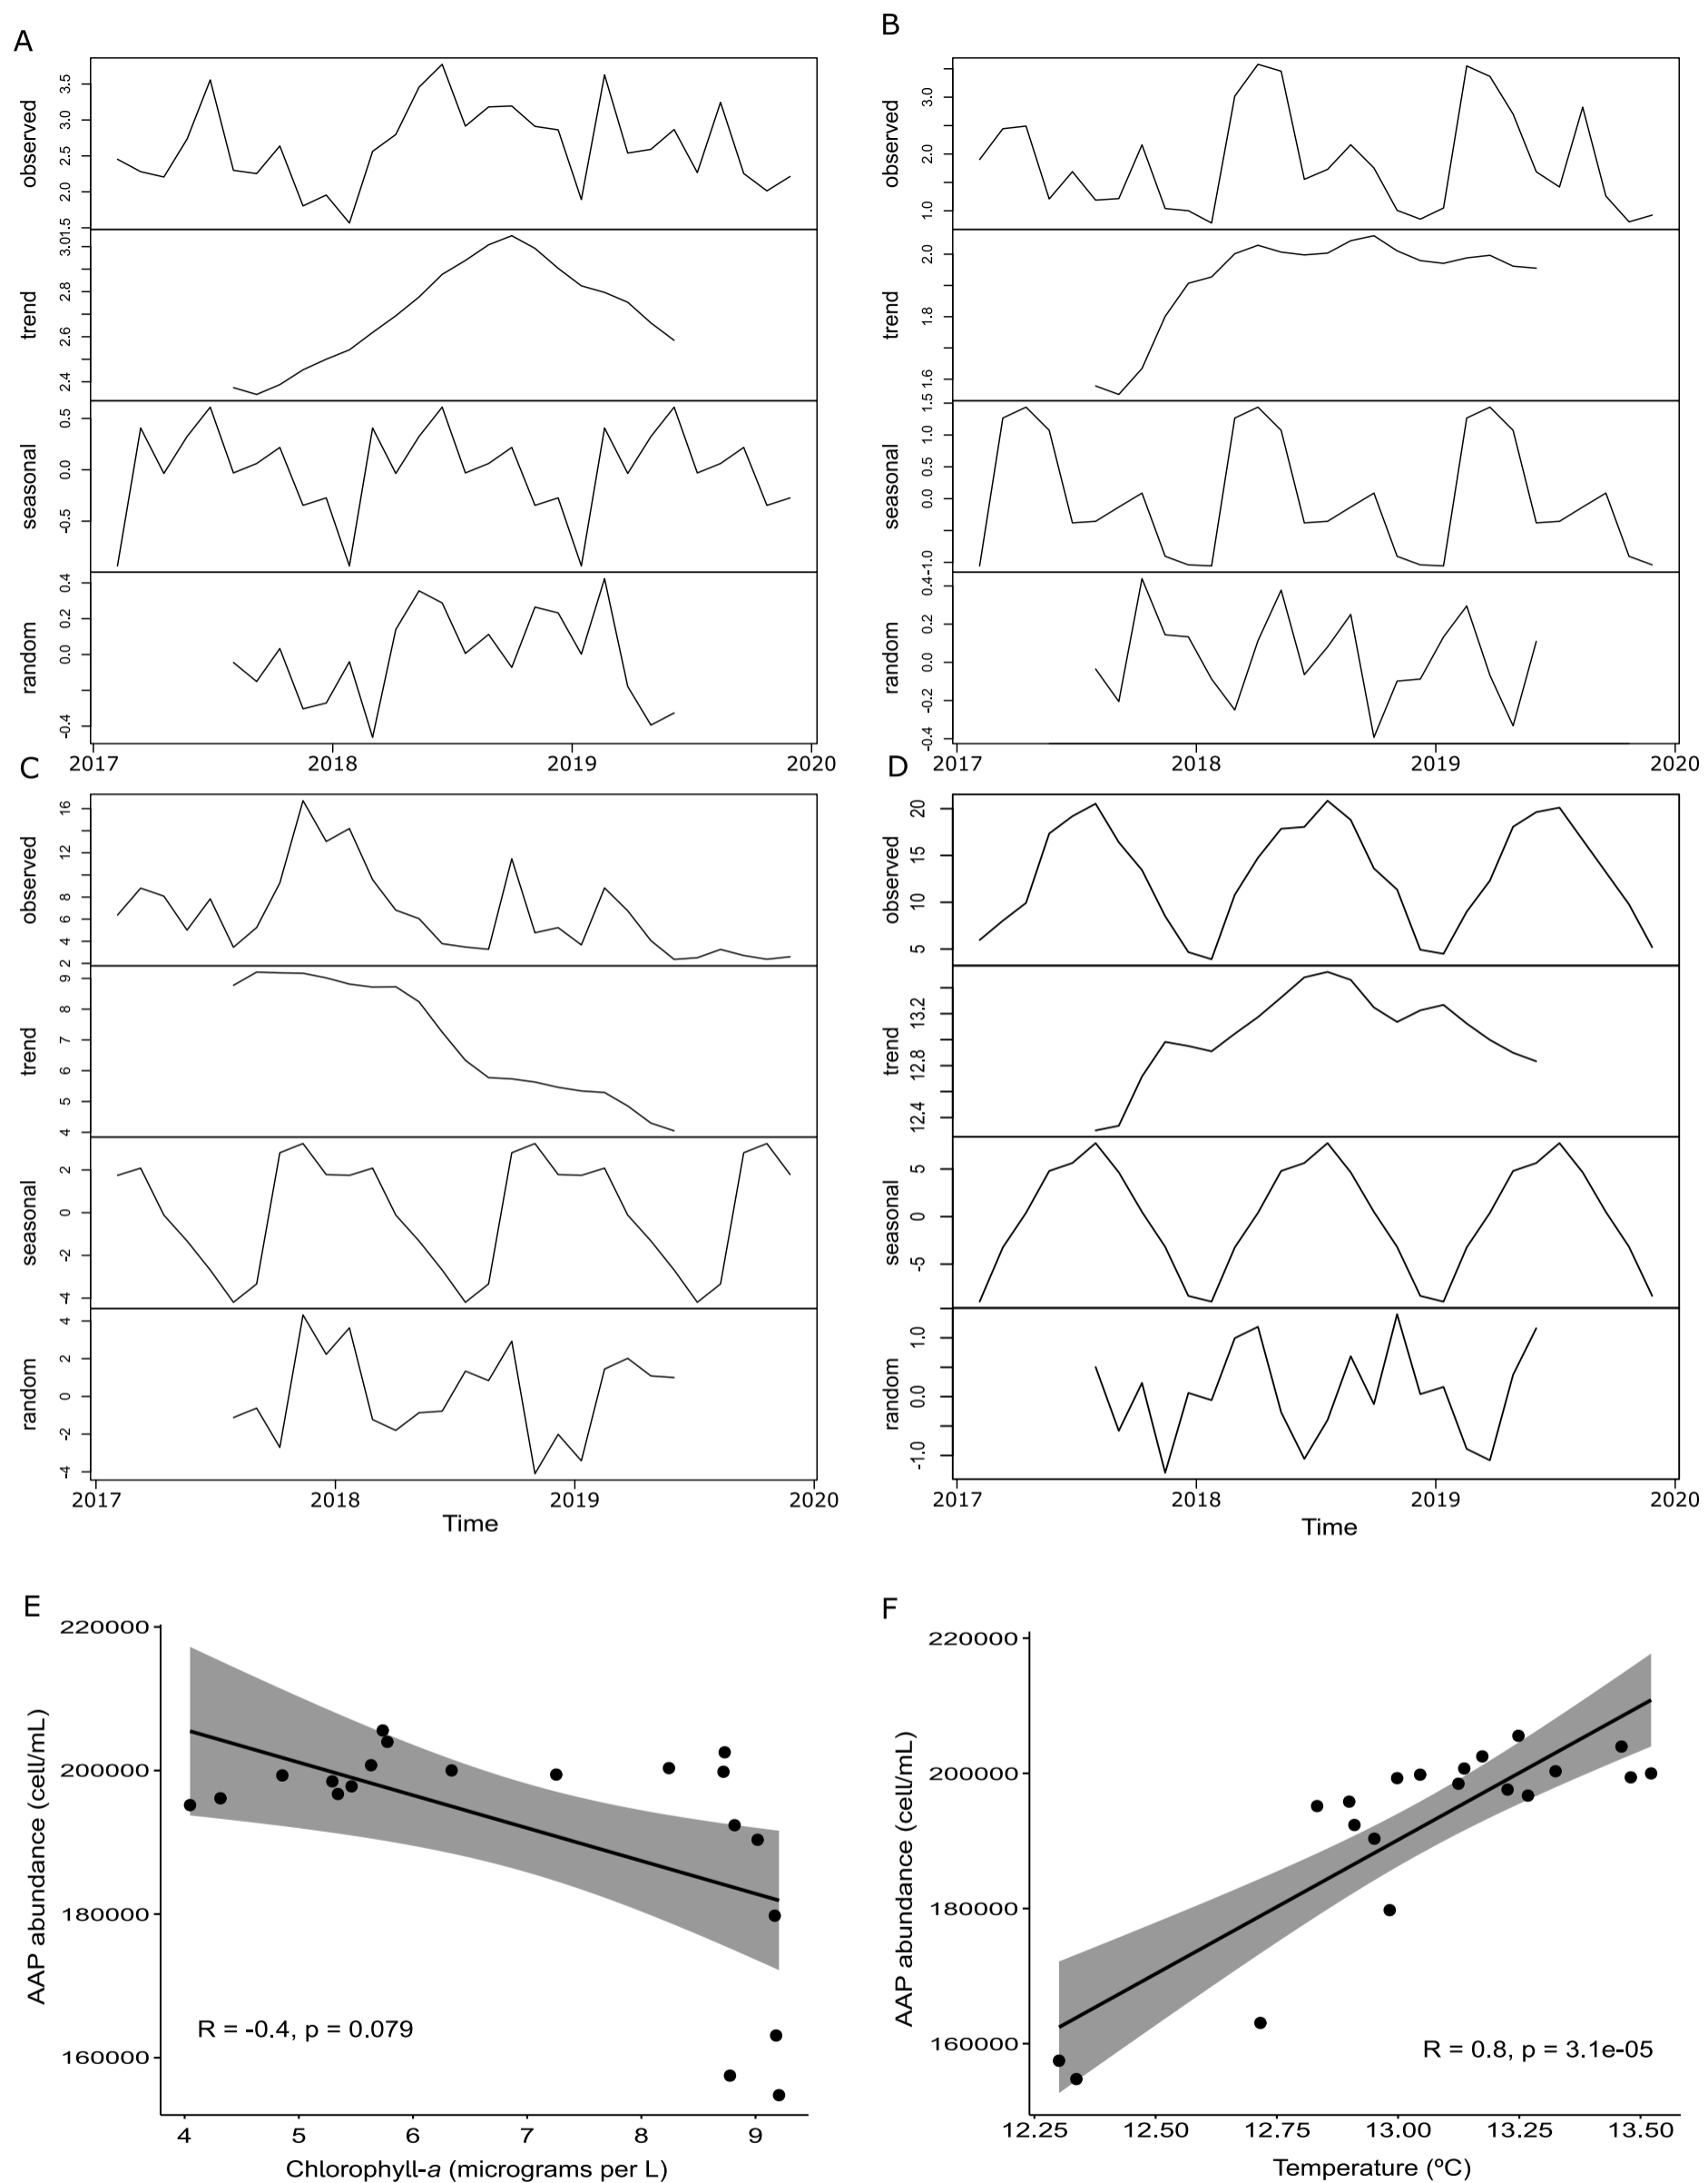

**Supplementary Figure S7 :** Decomposition of additive time series for bacterial abundance (A), AAP abundance (B), chlorophyll -*a* concentration (C) and temperature (D). Analysis was done in the TTR package version 0.24.3 (R version 4.3.0). Spearman correlation of the decomposed trends between AAP abundance and chlorophyll-*a* (E) and AAP abundance and temperature (F). R: spearman's rho value, p: p-value.
