# Supplementary material for: Phenology and ecological role of aerobic anoxygenic phototrophs in freshwaters
Source: PubMed Central journal article supplement (PMC10976687; doi:10.1186/s40168-024-01786-0), 2024-03-27
Supplement: 40168_2024_1786_MOESM8_ESM.pdf [file 40168_2024_1786_MOESM8_ESM.pdf]

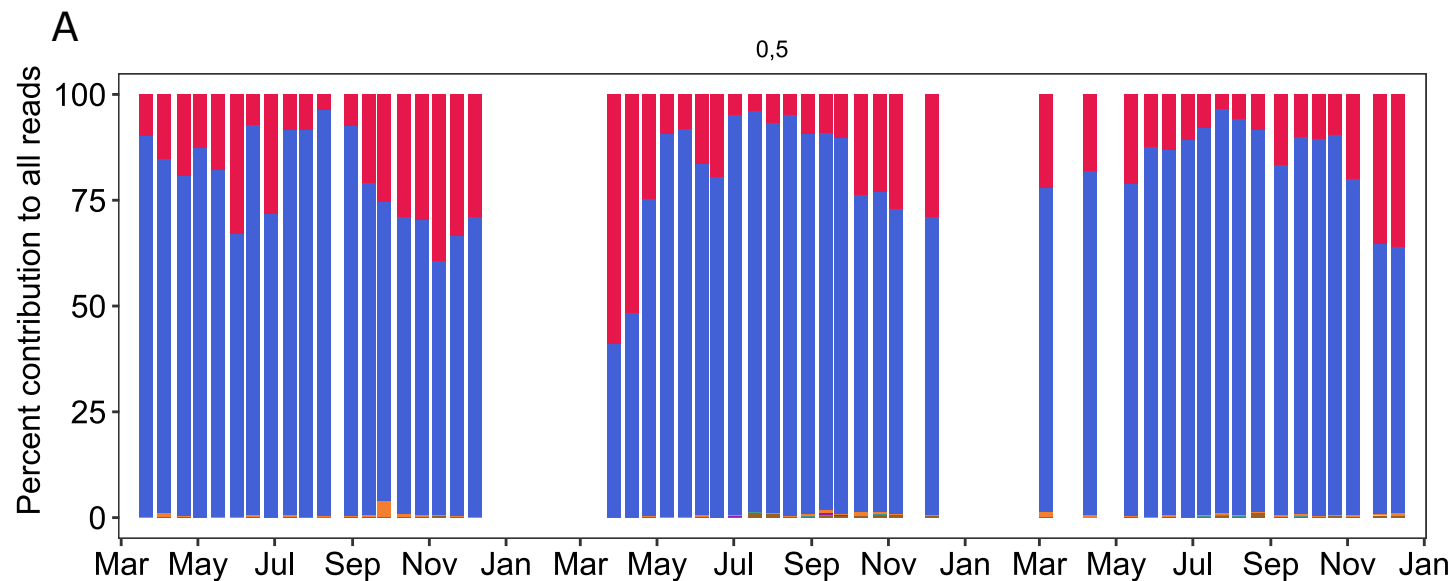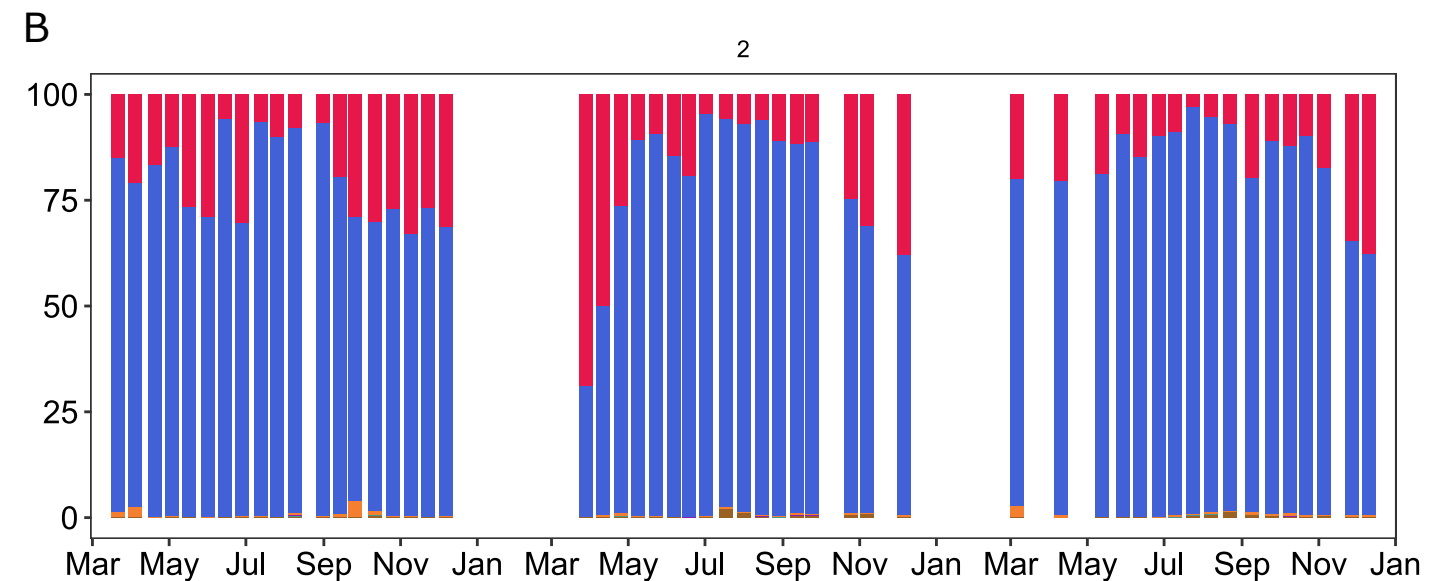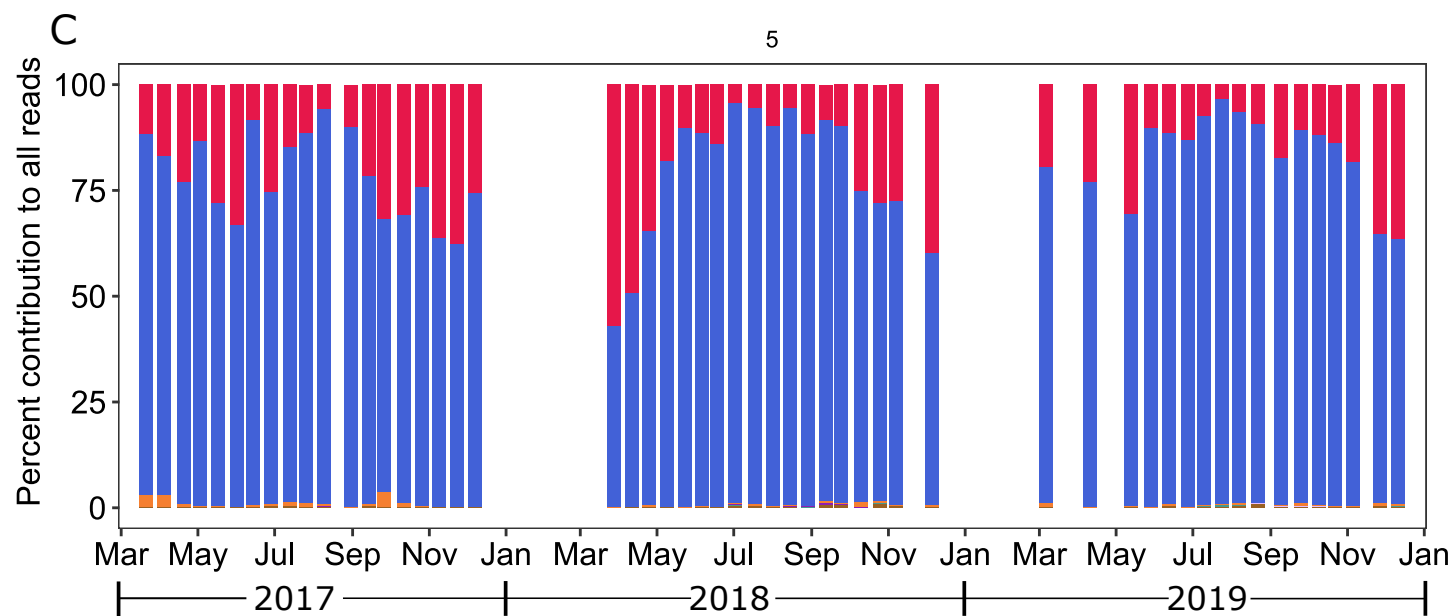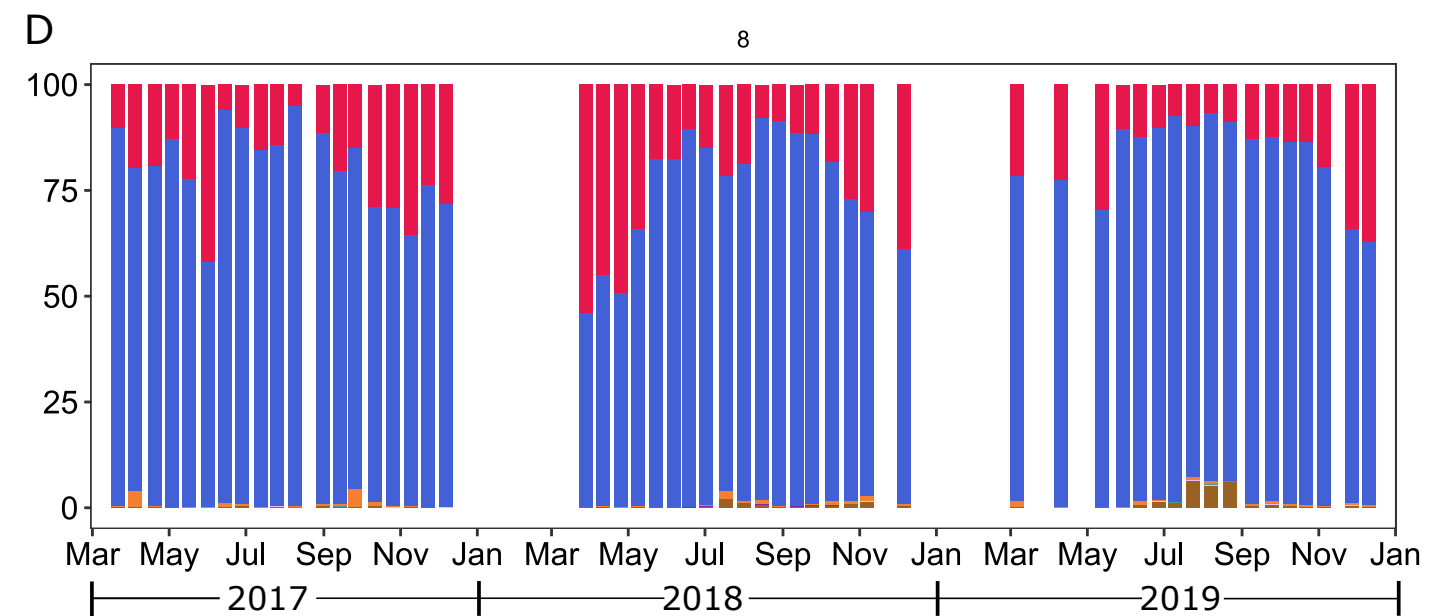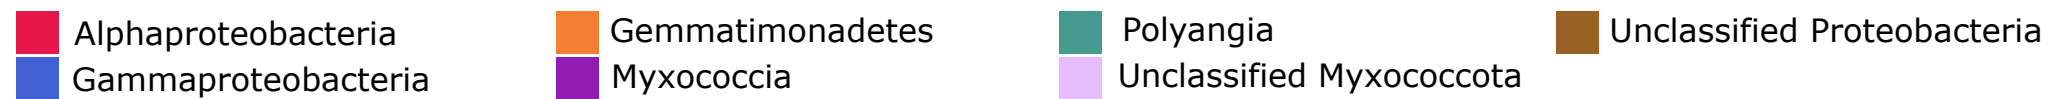

**Supplementary Figure S8: AAP bacteria community composition according to *pufM* gene taxonomic assignment at class level for 0.5 (A), 2 (B), 5 (C) and 8 meters' depth (D) during 3-years sampling campaign.**
