# Supplementary material for: Phenology and ecological role of aerobic anoxygenic phototrophs in freshwaters
Source: PubMed Central journal article supplement (PMC10976687; doi:10.1186/s40168-024-01786-0), 2024-03-27
Supplement: 40168_2024_1786_MOESM9_ESM.pdf [file 40168_2024_1786_MOESM9_ESM.pdf]

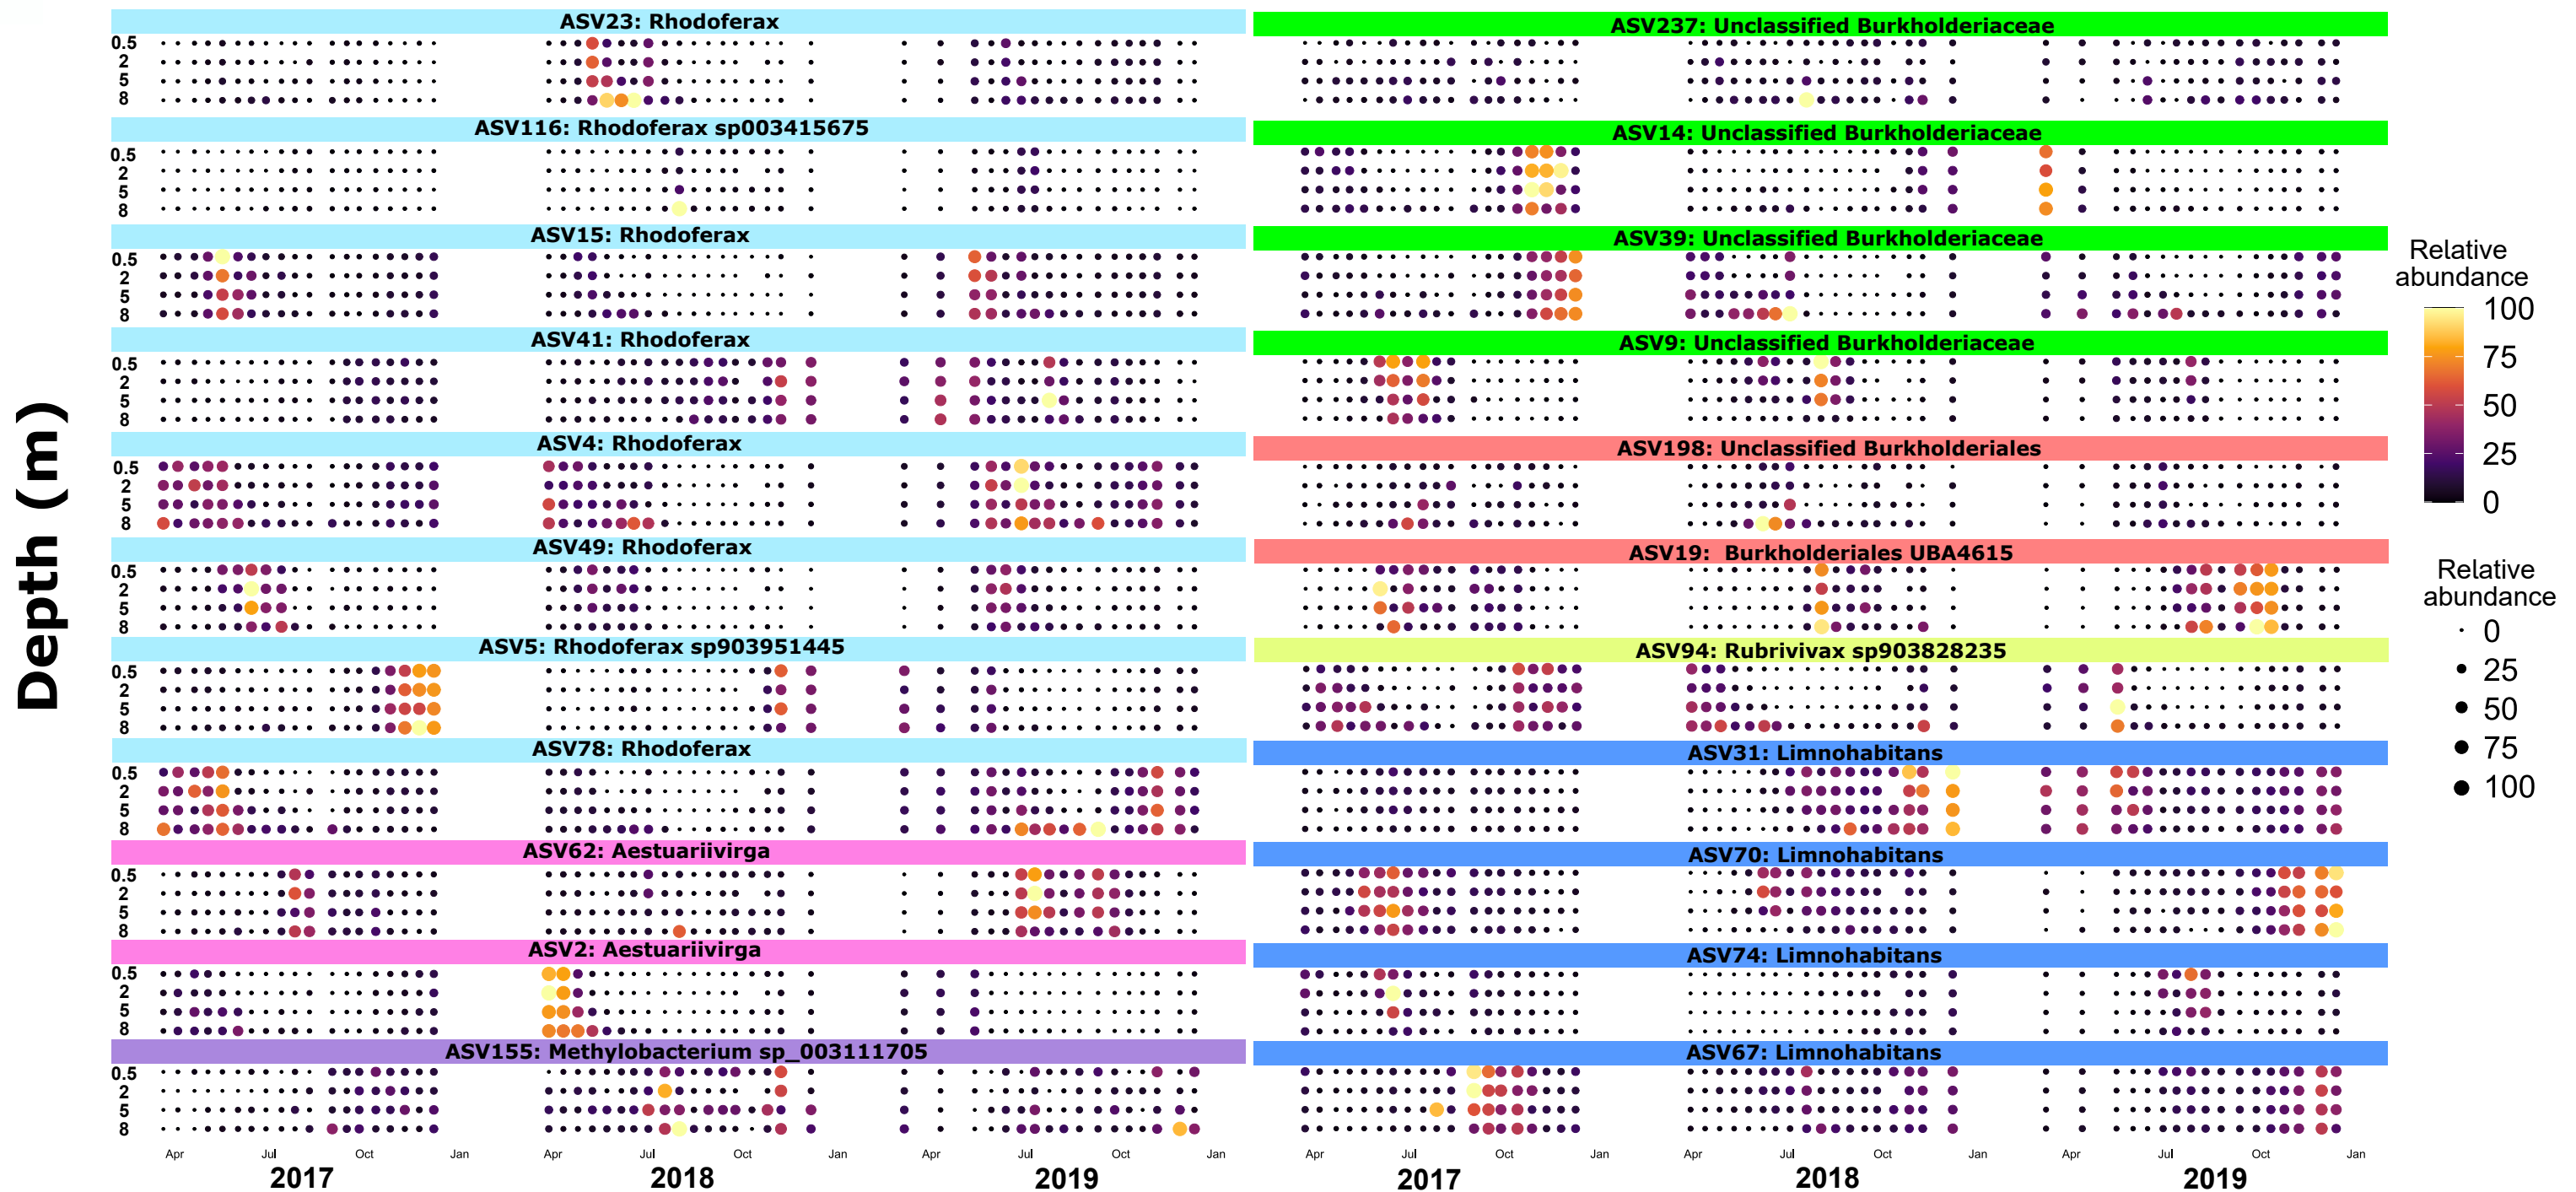

Supplementary Figure S9: Individually normalized relative abundance of the 22 core AAP ASVs during 3 years in 4 depths. Brighter colors and bigger dots indicate larger contribution to the AAP bacterial community. ASVs are clustered according to taxonomic classification at the maximum possible level (genus, family or order).
